# Supplementary material for: Cellular Immune Response against Nontypeable Haemophilus influenzae Infecting the Preinflamed Middle Ear of the Junbo Mouse
Source: PubMed Central journal article supplement (PMC6867859; doi:10.1128/iai.00689-19), 2019-11-18
Supplement: IAI.00689-19-s0001.pdf [file IAI.00689-19-s0001.pdf]

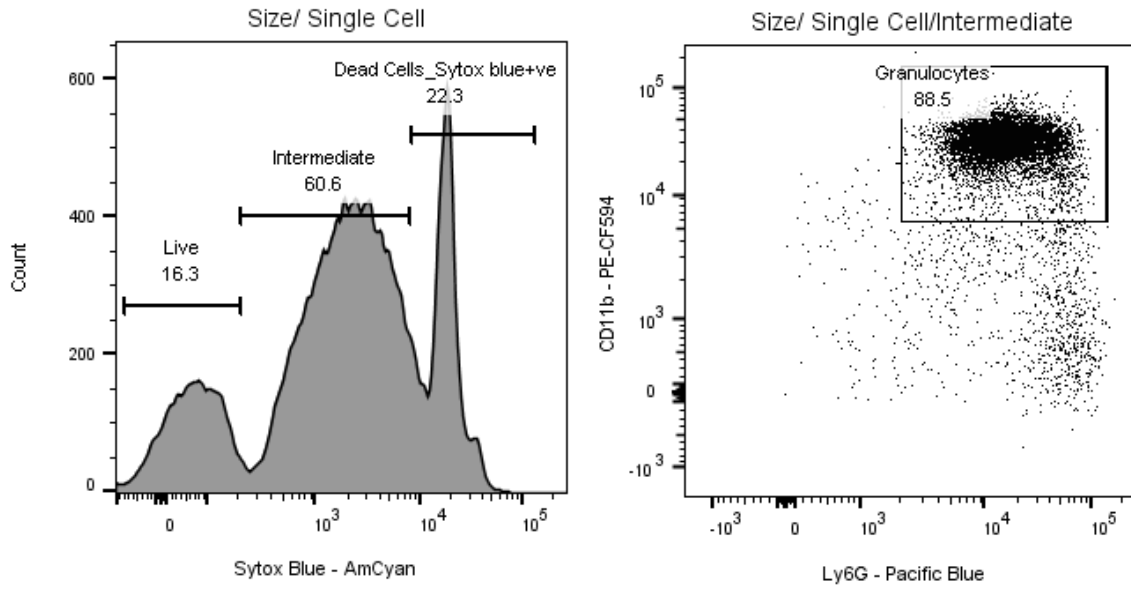

Fig S1: Analysis of Sytox blue histograms for neutrophil content.

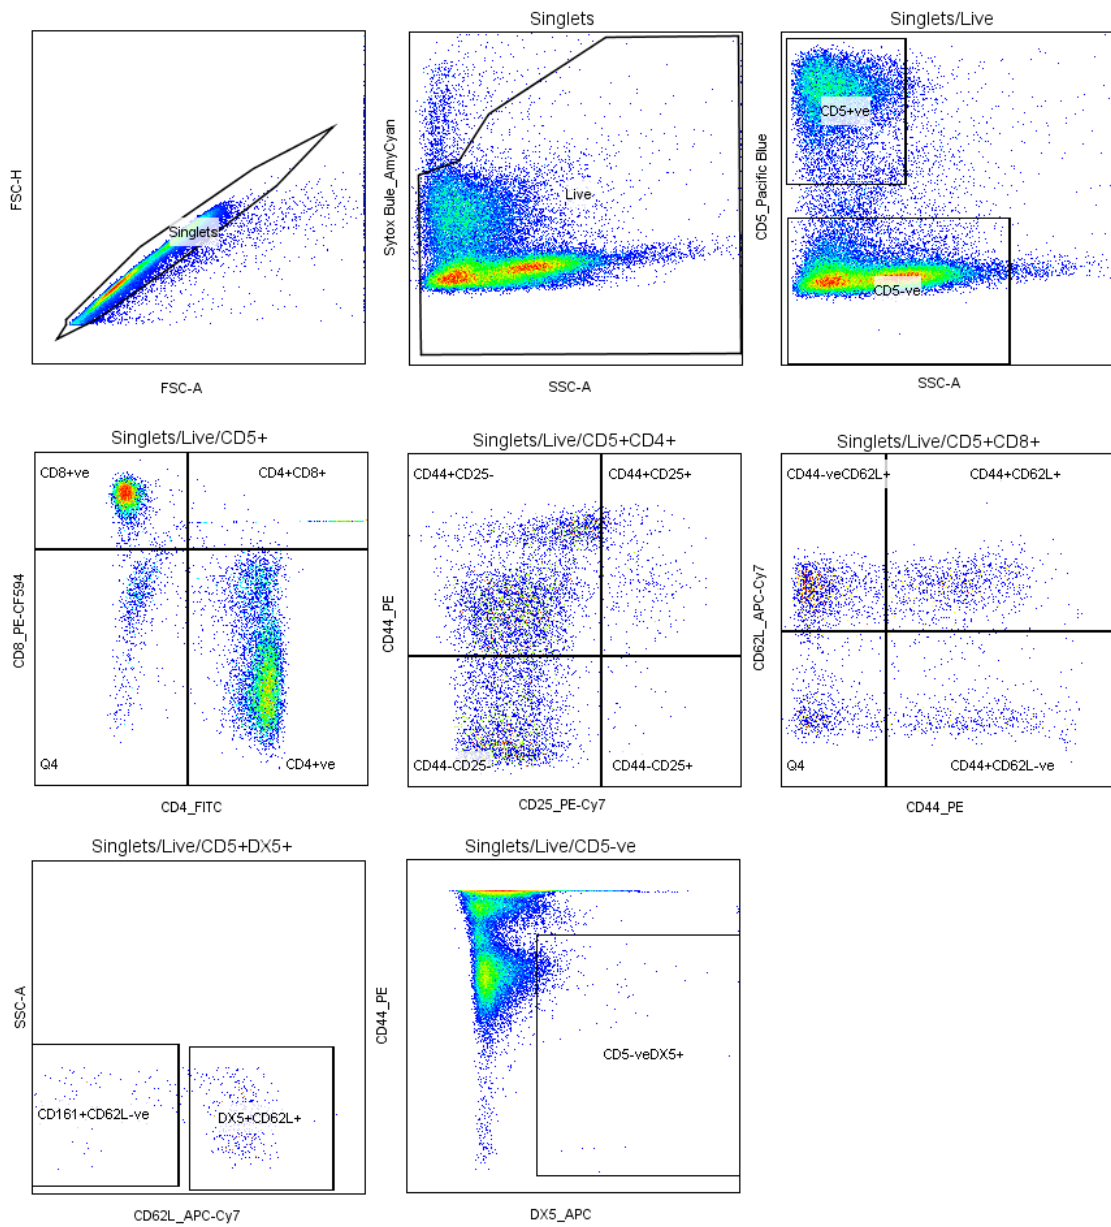

Fig S2: Flow cytometry panel 1 gating strategy.

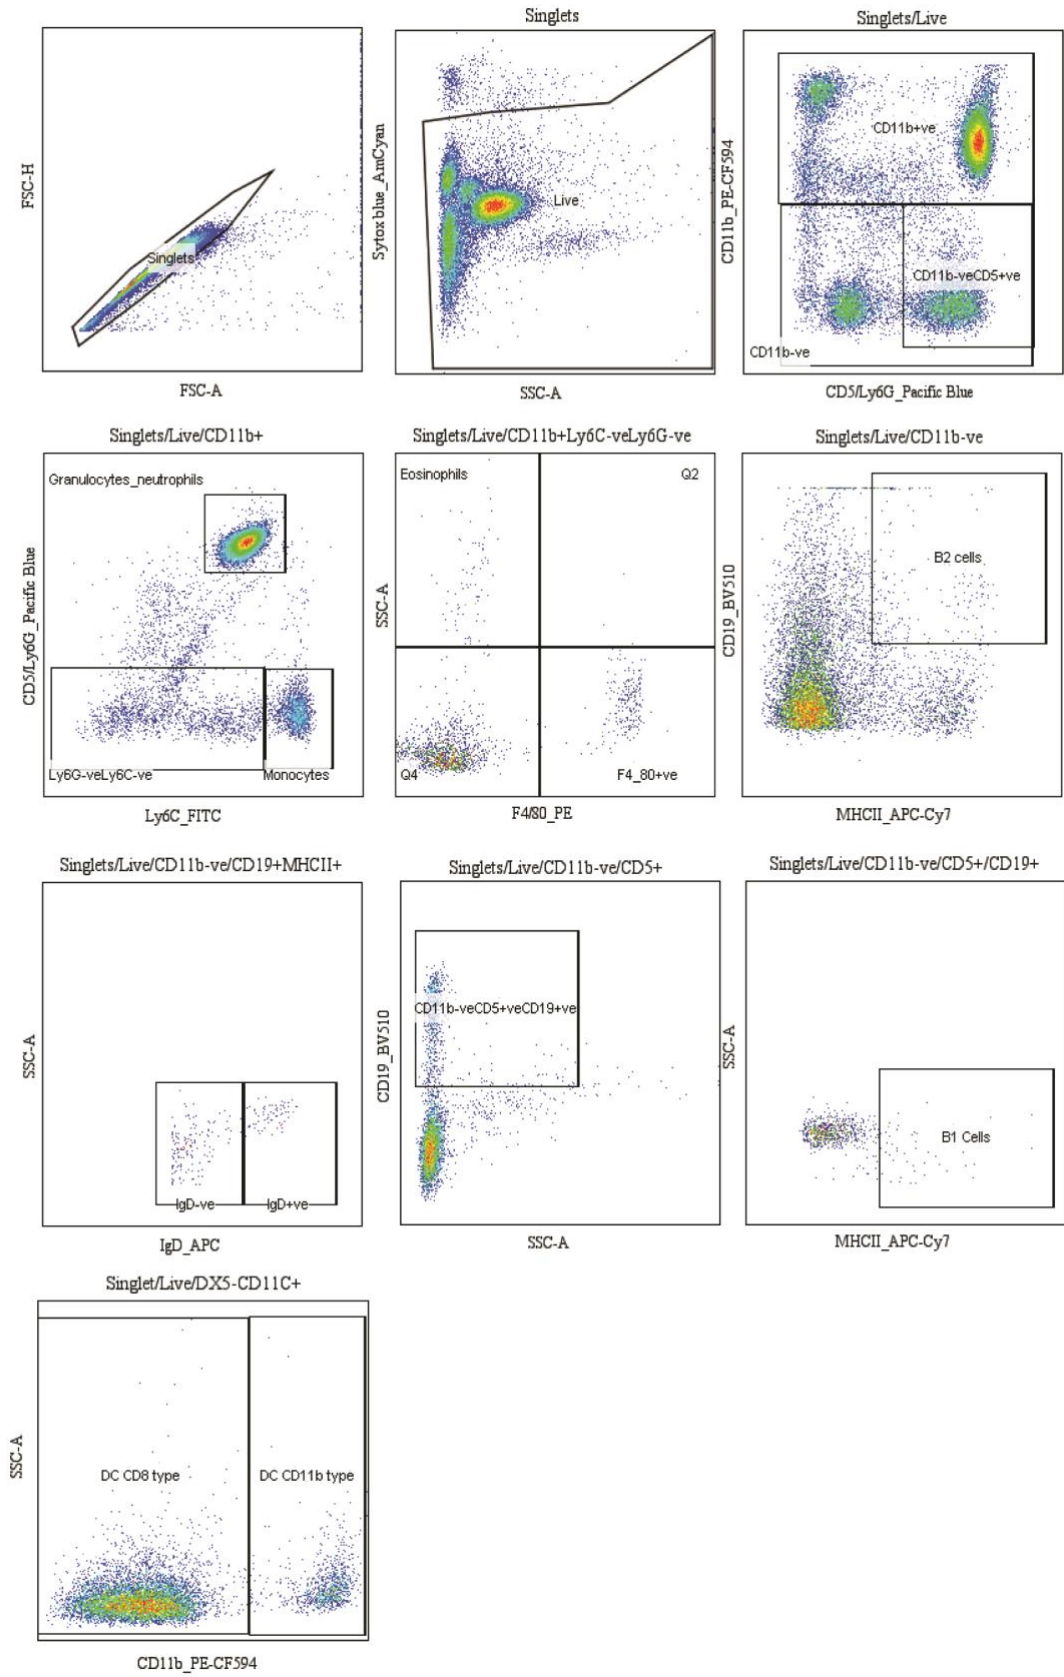

Fig S3: Flow cytometry panel 2 gating strategy.

| <b>Panel 1:</b>            |                    |                      |                |                |
|----------------------------|--------------------|----------------------|----------------|----------------|
| <b>Marker / Antigen</b>    | <b>Fluorophore</b> | <b>Concentration</b> | <b>Source</b>  | <b>Cat no.</b> |
| Live/dead                  | SytoxBlue          | 1:10000              | Invitrogen     | S11348         |
| CD5                        | BV421              | 1:200                | BD biosciences | 562739         |
| CD4                        | FITC               | 1:800                | BD biosciences | 553047         |
| CD8                        | PE-CF594           | 1:400                | BD biosciences | 562283         |
| CD25                       | PECy7              | 1:400                | BD biosciences | 552880         |
| CD62L                      | APC-Cy7            | 1:1600               | BD biosciences | 560514         |
| CD44                       | PE                 | 1:200                | BD biosciences | 553134         |
| TCRd                       | BV510              | 1:100                | BD biosciences | 563218         |
| DX5 (NK cell)              | APC                | 1:200                | BD biosciences | 560628         |
| <b>Panel 2:</b>            |                    |                      |                |                |
| <b>Marker / Antigen</b>    | <b>Fluorophore</b> | <b>Concentration</b> | <b>Source</b>  | <b>Cat no.</b> |
| Live/dead                  | SytoxBlue          | 1:10000              | Invitrogen     | S11348         |
| F4/80                      | PE                 | 1:400                | BD biosciences | 552957         |
| CD19                       | BV510              | 1:400                | BD biosciences | 562956         |
| DX5 (NK cell)              | APC                | 1:200                | BD biosciences | 560628         |
| Ly6C                       | FITC               | 1:400                | BD biosciences | 553104         |
| Ly6G                       | BV421              | 1:400                | BD biosciences | 562737         |
| CD5                        | BV421              | 1:200                | BD biosciences | 562739         |
| CD11b                      | PE-CF594           | 1:4800               | BD biosciences | 562287         |
| CD11c                      | PECy7              | 1:400                | BD biosciences | 558079         |
| IgD                        | APC                | 1:200                | BD biosciences | 560868         |
| MHCII (anti-Mouse I-A/I-E) | APC-Cy7            | 1:200                | BioLegend      | 107628         |
| <b>Panel 3:</b>            |                    |                      |                |                |
| <b>Marker / Antigen</b>    | <b>Fluorophore</b> | <b>Concentration</b> | <b>Source</b>  | <b>Cat no.</b> |
| CD4                        | FITC               | 1:800                | BD biosciences | 553047         |
| FoxP3                      | PerCP-Cy5.5        | 1:200                | BD biosciences | 563902         |
| CD25                       | PECy7              | 1:400                | BD biosciences | 552880         |

Table S1: Flow cytometry antibody and panels.

| <b>Gating strategy employed for classification of immune cells</b> |                         |                           |
|--------------------------------------------------------------------|-------------------------|---------------------------|
| <b>Cells</b>                                                       | <b>Positive Markers</b> | <b>Negative markers</b>   |
| Granulocytes/neutrophils                                           | CD11b+Ly6G+Ly6C+        | Sytox blue                |
| Eosinophils                                                        | CD11b+SSC-Ahi           | Sytox blue/Ly6C-Ly6G-     |
| Macrophages                                                        | CD11b+SSClowF4/80+      | Sytox blue/Ly6C-Ly6G-     |
| Monocytes                                                          | CD11b+Ly6C+             | Sytox blue/Ly6G-          |
| Dendritic cells_CD8 type                                           | CD11C+MHCII+            | Sytox blue/DX5-CD11b-     |
| Dendritic cells_CD11b type                                         | CD11C+MHCII+CD11b+      | Sytox blue/DX5-           |
| Natural killer (NK) cells                                          | DX5+                    | Sytox blue/CD5-           |
| T helper (Th)                                                      | CD5+CD4+                | Sytox blue/CD8-           |
| T helper effector                                                  | CD5+CD4+CD44+           | Sytox blue/CD8-           |
| T regulatory effector                                              | CD5+CD4+CD25+CD44+      | Sytox blue/CD8-           |
| T regulatory                                                       | CD5+CD4+CD25+           | Sytox blue/CD8-           |
| T cytotoxic (Tcyto)                                                | CD5+CD8+                | Sytox blue/CD4-           |
| T cytotoxic effector                                               | CD5+CD8+CD44+           | Sytox blue/CD4-CD62L-     |
| T cytotoxic naive                                                  | CD5+CD8+CD62L+          | Sytox blue/CD4-CD44-      |
| T cytotoxic resting                                                | CD5+CD8+CD62L+CD44+     | Sytox blue/CD4-           |
| B2 mature cells                                                    | CD19+MHCII+IgD+         | Sytox blue/CD11b-CD5-     |
| B2 immature cells                                                  | CD19+MHCII+             | Sytox blue/CD11b-CD5-IgD- |
| B1 cells                                                           | CD5+CD19+MHCII+         | Sytox blue/CD11b-         |
| NK-T cells                                                         | CD5+CD44+DX5+           | Sytox blue                |
| NK-T cell effector                                                 | CD5+CD44+DX5+           | Sytox blue/CD62L-         |
| NK-T cell resting                                                  | CD5+CD44+DX5+CD62L+     | Sytox blue                |

Table S2: Flow cytometry gating strategy.
